# Supplementary material
Source: Springer Nature journal article supplement (https://www.springermedizin.de/resource/supplementary/13012_2012_560_MOESM9_ESM.pdf/9629998)
Supplement: MOESM9 [file 9629998]

## **Stage 1: more than 40 persons = initial stakeholders**

**Following contact with inter-agency networks, recruit over 40 persons who match basic RESTORE requirements (x 5 research sites)**

⋮

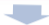

## **Stage 2: approx 30-40 persons = stakeholders**

**Approx 30-40 persons continue as Stakeholders in RESTORE case-studies (x5 research sites. They engage in PLA fieldwork processes that involve sharing and assessing the Portfolio of Guidances/Training Initiatives . They select ONE for implementation activity.**

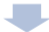

## **Stage 3: approx 20 persons = participants/implementers**

**Approx 20 persons continue in RESTORE implementation case studies in each of our 5 research sites .**
